# Supplementary material
Source: Springer Nature journal article supplement (https://www.springermedizin.de/resource/supplementary/12916_2010_330_MOESM1_ESM.pdf/9599652)
Supplement: MOESM1 [file 9599652]

Health facilities identified in Latin America, Africa and Asia

WHO Global Survey  
- 3 Continents  
- 24 Countries  
- 373 Facilities  
- Deliveries (n=290610)

**Latin America**  
n = 98072

*Data not analysed*

- Data from second baby of multiple births (n=978)
- Unknown mode of delivery (n=111)\*
- Unknown onset of labour (n=90)

n=96893

**Asia**  
n = 109101

*Data not analysed*

- Data from second baby of multiple births (n=1119)
- Unknown mode of delivery (n=31)\*
- Unknown onset of labour (n=1)

n=107950

**Africa**  
n = 83437

*Data not analysed*

- Data from second baby of multiple births (n=1496)
- Unknown mode of delivery (n=171)\*
- Unknown onset of labour (n=48)

n=81722

Data analysed  
(n=286,565 deliveries)

Vaginal Deliveries  
74.3% (n=212847)

Caesarean Deliveries  
25.7% (n=73718)

Spontaneous  
71.7% (n=205551)

Operative  
2.6% (n=7296)

Antepartum  
10.0% (n=28746)

Intrapartum  
15.7% (n=44972)

Without indications  
0.6 (n=1735)

With indications  
9.4% (n=27011)

Without indications  
0.3% (n=950)

With indications  
15.4% (n=44022)
